# Supplementary material
Source: MDPI journal article supplement (https://www.mdpi.com/1424-2818/11/8/118)
Supplement: s1 [file s1]

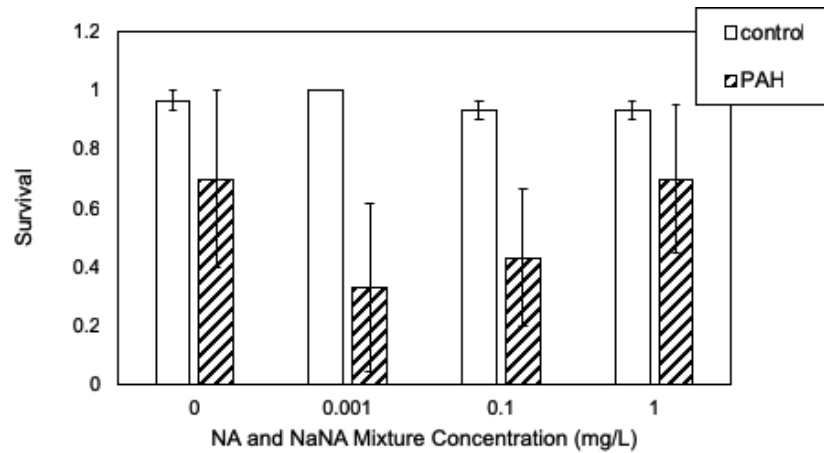

**Figure S1.** Comparison of mean survival in *Hexagenia* mayfly nymphs exposed to a naphthenic acid and sodium naphthenate mixture in either control or PAH-spiked and sediment treatments for a 21-d period.

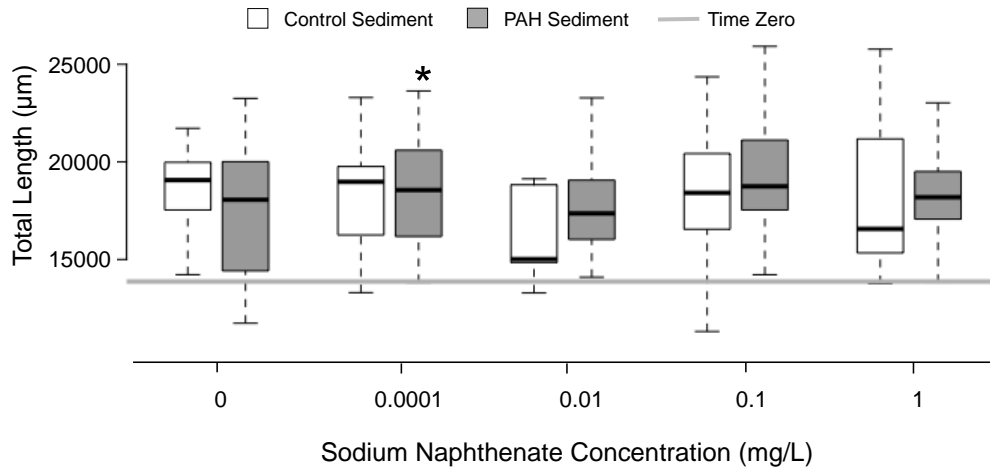

**Figure S2.** Comparison of sublethal changes in total length in *Hexagenia* mayfly nymphs exposed to a naphthenic acid and sodium naphthenate mixture in either control (white, left) or a 1:3 mixture of PAH-spiked and control (grey, right) sediment treatments for a 21-d period. Significant differences between treatments are indicated by "\*" and the time zero measurements are indicated by grey horizontal lines for comparison.

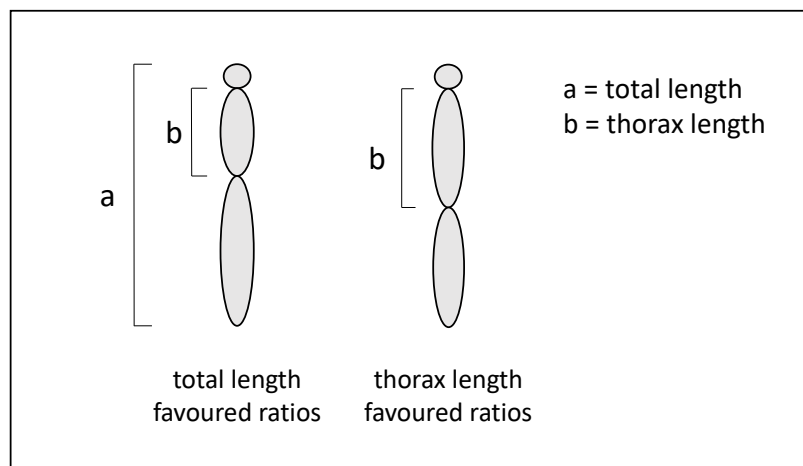

**Figure S3.** Representation of total length-favoured and thorax length-favoured body segments in *Hexagenia*.
